# Supplementary material for: Photostabilization of endogenous porphyrins: excited state quenching by fused ring cyanoacrylates
Source: Royal Society of Chemistry journal article supplement (doi:10.1039/c4pp00090k), 2014-06-05
Supplement: c4pp00090k1.pdf [file c4pp00090k1.pdf]

Electronic Supplementary Information (ESI)

# Photostabilization of Endogenous Porphyrins: Excited State Quenching by Fused Ring Cyanoacrylates.

Steffen Jockusch,<sup>\*a</sup> Craig Bonda<sup>b</sup> and Shengkui Hu<sup>b</sup>

<sup>a</sup>Department of Chemistry, Columbia University, New York, NY 10027, USA.

<sup>b</sup>The HallStar Company, Chicago, IL 60606, USA.

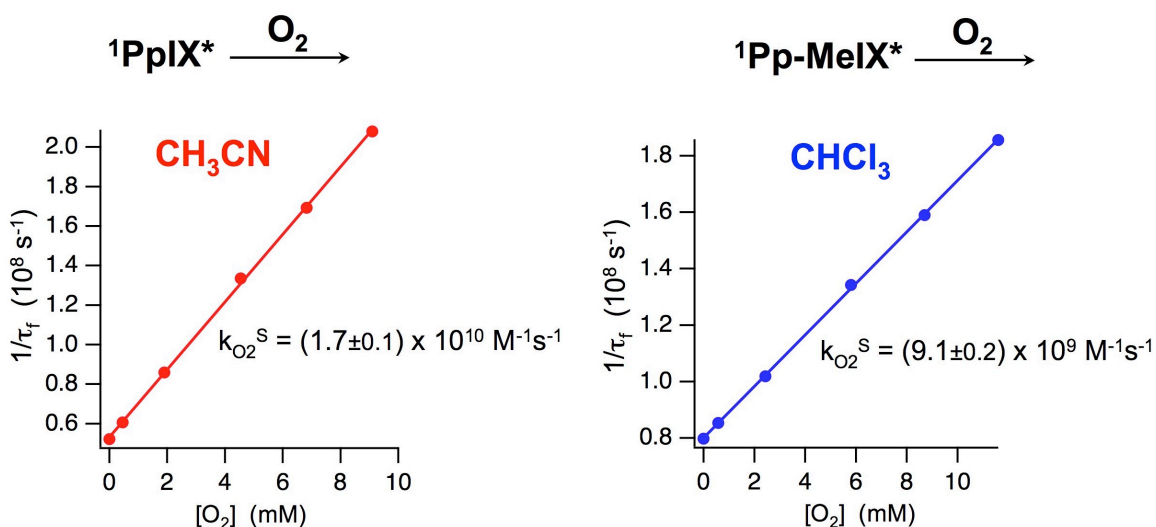

**Fig. S1** Determination of the bimolecular quenching rate constant  $k_q^S$  of quenching of PpIX and Pp-MeIX fluorescence by molecular oxygen from the slope of the plot of the inverse fluorescence lifetime vs. the dissolved oxygen concentration.

$\lambda_{ex} = 496 \text{ nm}$ ;  $\lambda_{em} = 630 \text{ nm}$ .

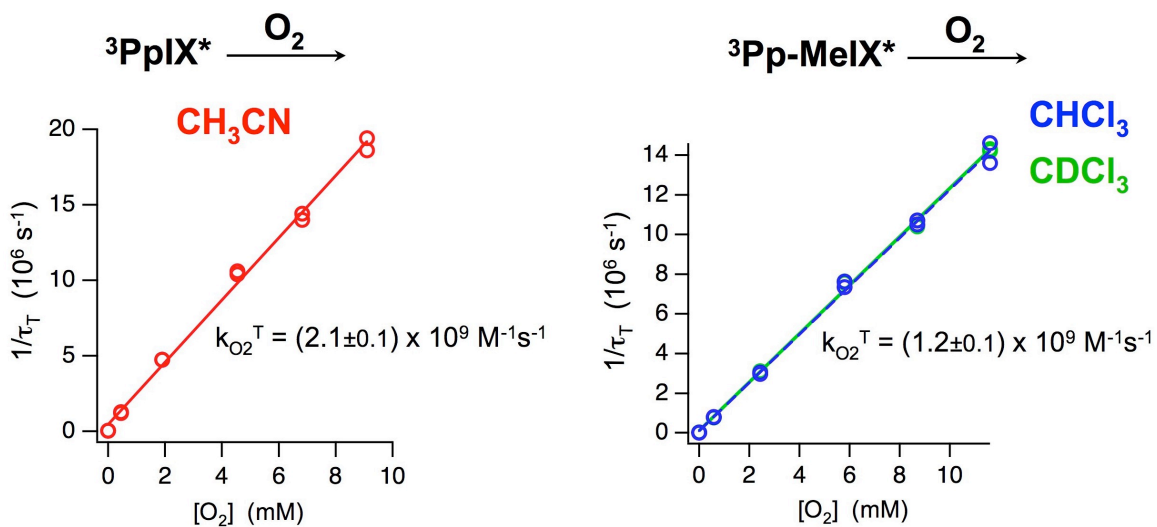

**Fig. S2** Determination of the bimolecular quenching rate constants  $k_{\text{q}}^{\text{T}}$  of quenching of PpIX and Pp-MeIX triplet states by molecular oxygen from the slope of the plot of the inverse triplet lifetime (monitored at 440 nm) vs. the dissolved oxygen concentration.  $\lambda_{\text{ex}} = 532 \text{ nm}$ .

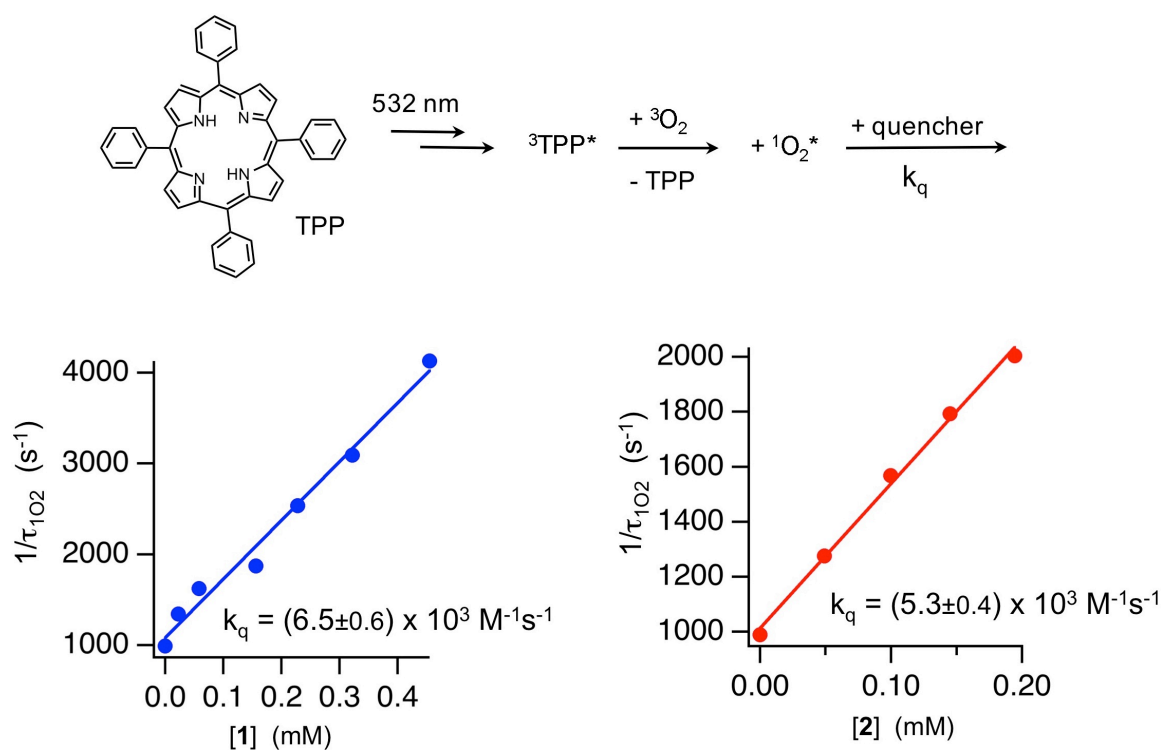

**Fig. S3** Determination of the bimolecular quenching rate constants  $k_q$  of quenching of singlet oxygen ( $^1\text{O}_2$ ) by **1** and **2** from the slope of the plot of the inverse singlet oxygen lifetime (monitored by phosphorescence at 1270 nm) vs. the concentration of **1** and **2**. Tetraphenylporphyrin (TPP) was used as  $^1\text{O}_2$  sensitizer with  $\lambda_{\text{ex}} = 532 \text{ nm}$ .
